# Supplementary material for: Genetic Analysis of Avian Gyrovirus 2 Variant-Related Gyrovirus Detected in Farmed King Ratsnake (Elaphe carinata): The First Report from China
Source: PubMed Central journal article supplement (PMC6963503; doi:10.3390/pathogens8040185), 2019-10-12
Supplement: pathogens-08-00185-s001.pdf [file pathogens-08-00185-s001.pdf]

Supplement 1. The sequence information of reference strains used in this study

| Strains            | Sample            | Source                       | Date       | Country | Accession Nos. |
|--------------------|-------------------|------------------------------|------------|---------|----------------|
| <b>NX1506-1</b>    | Liver and spleen  | <i>Gallus gallus</i>         | 25.06.2015 | China   | KX708508       |
| <b>NX1506-2</b>    | Liver and spleen  | <i>Gallus gallus</i>         | 26.06.2015 | China   | KX708509       |
| <b>NX1510</b>      | Liver and spleen  | <i>Gallus gallus</i>         | 27.10.2015 | China   | KX708513       |
| <b>LN1511</b>      | Liver and spleen  | <i>Gallus gallus</i>         | 27.11.2015 | China   | KX708515       |
| <b>JL1508</b>      | Liver and spleen  | <i>Gallus gallus</i>         | 25.08.2015 | China   | KX708511       |
| <b>JX1602</b>      | Liver and spleen  | <i>Gallus gallus</i>         | 22.02.2016 | China   | KX708519       |
| <b>CL33</b>        | Feces             | <i>Homo sapiens</i>          | 2008       | Chile   | JQ308212       |
| <b>G13</b>         | Feces             | <i>Mustela putorius furo</i> | 2011       | Hungary | KJ452214       |
| <b>S53-It</b>      | Serum             | <i>Gallus gallus</i>         | 12.01.2014 | Italy   | KU168250       |
| <b>HLJ1506-2</b>   | Liver and spleen  | <i>Gallus gallus</i>         | 23.06.2015 | China   | KX708522       |
| <b>GS1512</b>      | Liver and spleen  | <i>Gallus gallus</i>         | 07.12.2015 | China   | KX708517       |
| <b>HLJ1510</b>     | Liver and spleen  | <i>Gallus gallus</i>         | 20.10.2015 | China   | KX708507       |
| <b>915F06007FD</b> | Healthy face skin | <i>Homo sapiens</i>          | 05.2009    | France  | FR823283       |
| <b>GZ1601</b>      | Liver and spleen  | <i>Gallus gallus</i>         | 04.01.2016 | China   | KX708518       |
| <b>Ave3</b>        | Serum             | <i>Gallus gallus</i>         | 14.07.2016 | Brazil  | HM590588       |
| <b>HE1511</b>      | Liver and spleen  | <i>Gallus gallus</i>         | 20.11.2016 | China   | KX708514       |
| <b>HLJ1603-2</b>   | Liver and spleen  | <i>Gallus gallus</i>         | 03.03.2016 | China   | KX708521       |
| <b>HLJ1603-1</b>   | Liver and spleen  | <i>Gallus gallus</i>         | 03.03.2016 | China   | KX708520       |
| <b>HLJ1508</b>     | Liver and spleen  | <i>Gallus gallus</i>         | 03.08.2016 | China   | KX708510       |
| <b>JL1511</b>      | Liver and spleen  | <i>Gallus gallus</i>         | 27.11.2015 | China   | KX708516       |
| <b>HLJ1506-1</b>   | Liver and spleen  | <i>Gallus gallus</i>         | 03.06.2016 | China   | KX708506       |
| <b>G17</b>         | Feces             | <i>Mustela putorius furo</i> | 2011       | Hungary | KJ452213       |
| <b>RS-BR-15-2S</b> | Feces             | <i>Gallus gallus</i>         | 2015       | Brazil  | MG846492       |

---

|                   |       |                      |            |        |          |
|-------------------|-------|----------------------|------------|--------|----------|
| <b>RS-BR-2015</b> | Feces | <i>Gallus gallus</i> | 31.07.2015 | Brazil | KY039279 |
| <b>JQ690763.1</b> | Feces | <i>Homo sapiens</i>  | 2012       | China  | JQ690763 |

---

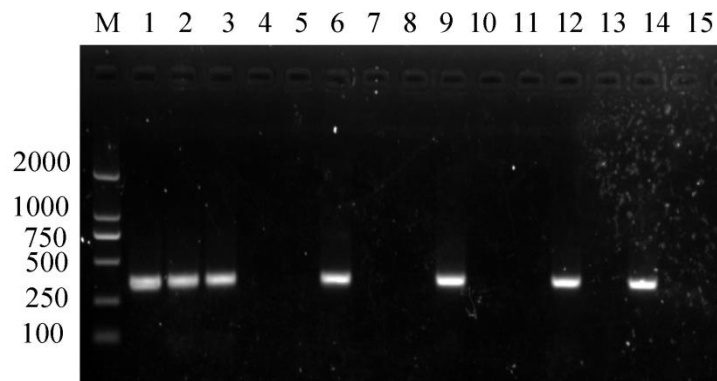

Supplement 2. Detection results of AGV2 in Farm B samples by electrophoresis. M: 2000 marker; 1–11: fecal samples, 12 and 13: liver tissue samples; 14: positive control; 15: negative control. The DNA template used in the positive control was the preserved and correctly sequenced AGV2 sample and that in the negative control was sterile water.
